# Supplementary material
Source: Springer Nature journal article supplement (https://www.springermedizin.de/resource/supplementary/12916_2009_200_MOESM1_ESM.pdf/9599378)
Supplement: MOESM1 [file 9599378]

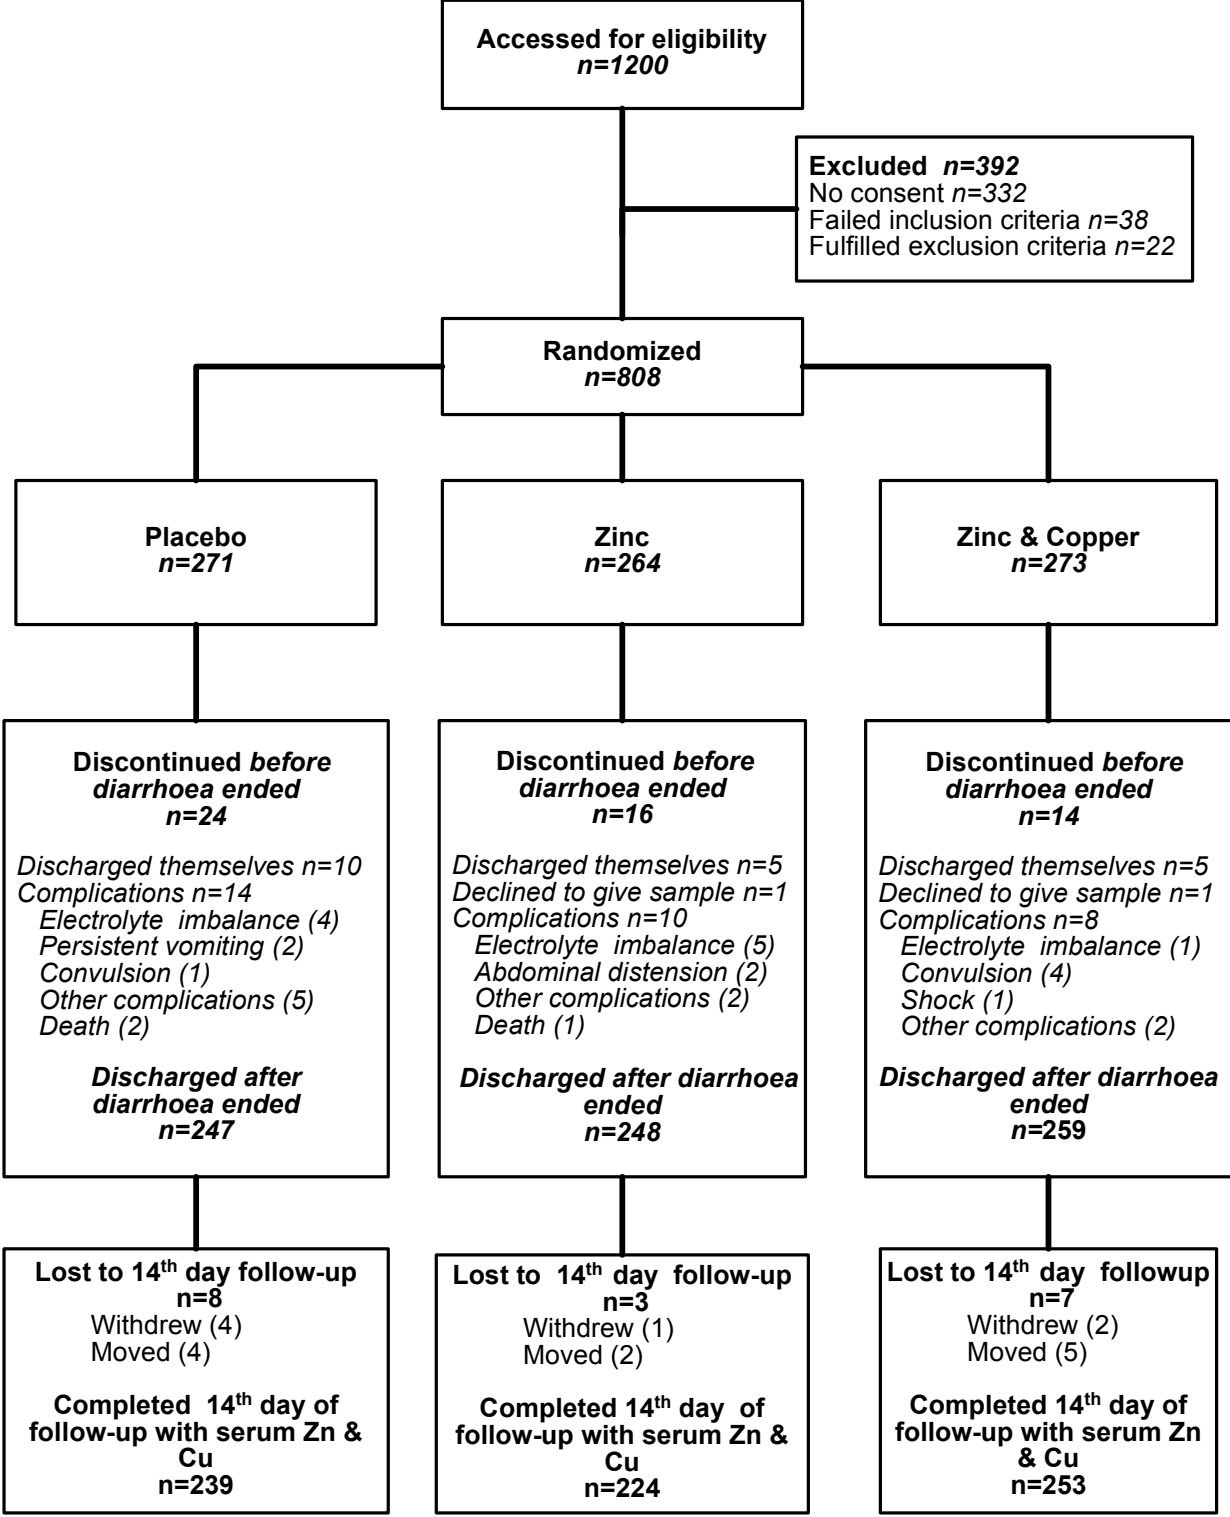

**Accessed for eligibility**  
*n=1200*

**Excluded *n=392***  
No consent *n=332*  
Failed inclusion criteria *n=38*  
Fulfilled exclusion criteria *n=22*

**Randomized**  
*n=808*

**Placebo**  
*n=271*

**Zinc**  
*n=264*

**Zinc & Copper**  
*n=273*

**Discontinued before diarrhoea ended**  
*n=24*  
*Discharged themselves n=10*  
*Complications n=14*  
*Electrolyte imbalance (4)*  
*Persistent vomiting (2)*  
*Convulsion (1)*  
*Other complications (5)*  
*Death (2)*  
  
**Discharged after diarrhoea ended**  
*n=247*

**Discontinued before diarrhoea ended**  
*n=16*  
*Discharged themselves n=5*  
*Declined to give sample n=1*  
*Complications n=10*  
*Electrolyte imbalance (5)*  
*Abdominal distension (2)*  
*Other complications (2)*  
*Death (1)*  
  
**Discharged after diarrhoea ended**  
*n=248*

**Discontinued before diarrhoea ended**  
*n=14*  
*Discharged themselves n=5*  
*Declined to give sample n=1*  
*Complications n=8*  
*Electrolyte imbalance (1)*  
*Convulsion (4)*  
*Shock (1)*  
*Other complications (2)*  
  
**Discharged after diarrhoea ended**  
*n=259*

**Lost to 14<sup>th</sup> day follow-up**  
*n=8*  
*Withdrawn (4)*  
*Moved (4)*  
  
**Completed 14<sup>th</sup> day of follow-up with serum Zn & Cu**  
*n=239*

**Lost to 14<sup>th</sup> day follow-up**  
*n=3*  
*Withdrawn (1)*  
*Moved (2)*  
  
**Completed 14<sup>th</sup> day of follow-up with serum Zn & Cu**  
*n=224*

**Lost to 14<sup>th</sup> day followup**  
*n=7*  
*Withdrawn (2)*  
*Moved (5)*  
  
**Completed 14<sup>th</sup> day of follow-up with serum Zn & Cu**  
*n=253*
